# Supplementary material for: Highly active and stable nickel–molybdenum nitride (Ni2Mo3N) electrocatalyst for hydrogen evolution
Source: Royal Society of Chemistry journal article supplement (doi:10.1039/d0ta10090k), 2021-01-01
Supplement: d0ta10090k1.pdf [file d0ta10090k1.pdf]

## Electronic Supplementary Information (ESI)

### Highly Active and Stable Nickel-Molybdenum Nitride ( $\text{Ni}_2\text{Mo}_3\text{N}$ )

#### Electrocatalyst for Hydrogen Evolution

Sang Heon Park,<sup>#a</sup> Tae Hwan Jo,<sup>#a</sup> Min Hee Lee,<sup>b</sup> Kenta Kawashima,<sup>c</sup> C. Buddie Mullins,<sup>\*c</sup> Hyung-Kyu Lim,<sup>\*a</sup> and Duck Hyun Youn<sup>\*a</sup>

<sup>a</sup> Department of Chemical Engineering, Interdisciplinary Program in Advanced Functional Materials and Devices Development, Kangwon National University, Chuncheon, Gangwon-do 24341, South Korea.

<sup>b</sup> School of Energy and Chemical Engineering, Ulsan National Institute of Science and Technology (UNIST), Ulsan 44919, South Korea.

<sup>c</sup> McKetta Department of Chemical Engineering and Department of Chemistry, Center for Electrochemistry, University of Texas at Austin, 1 University Station, C0400 Austin, TX 78712-0231, United States.

*#These authors contributed equally to this study.*

\*Corresponding Author. E-mail: hklim@kangwon.ac.kr (Hyung-Kyu Lim), youndh@kangwon.ac.kr (Duck Hyun Youn), mullins@che.utexas.edu (C. Buddie Mullins)

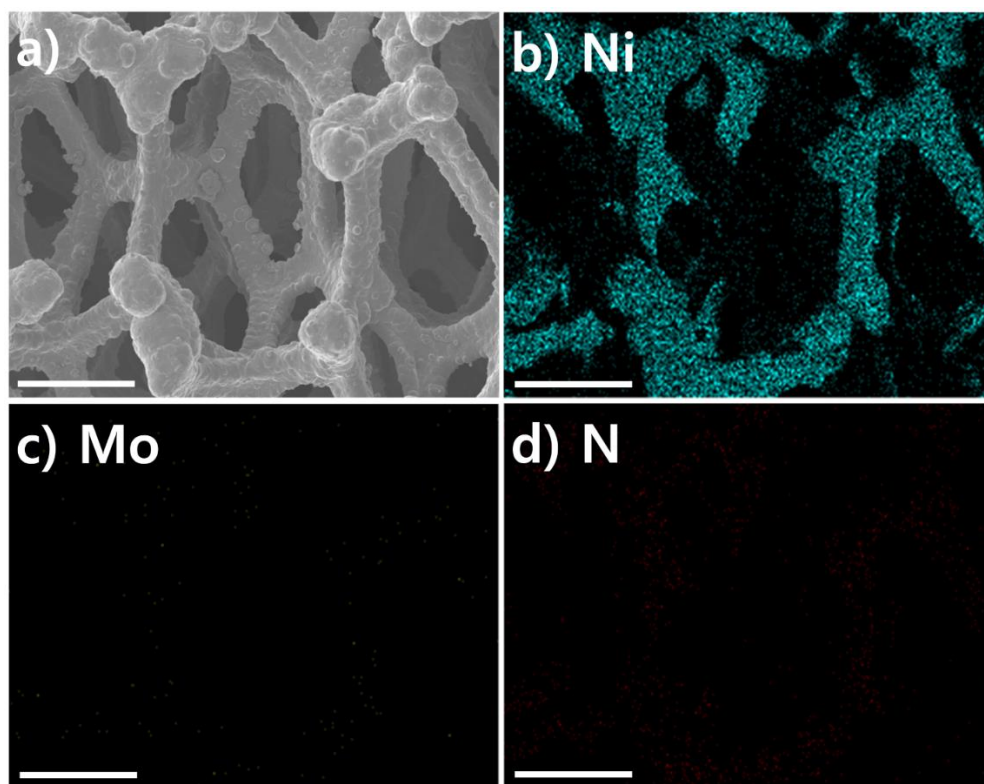

**Fig. S1.** SEM-EDS elemental mapping images for pristine Ni foam (scale bar = 300  $\mu\text{m}$ ).

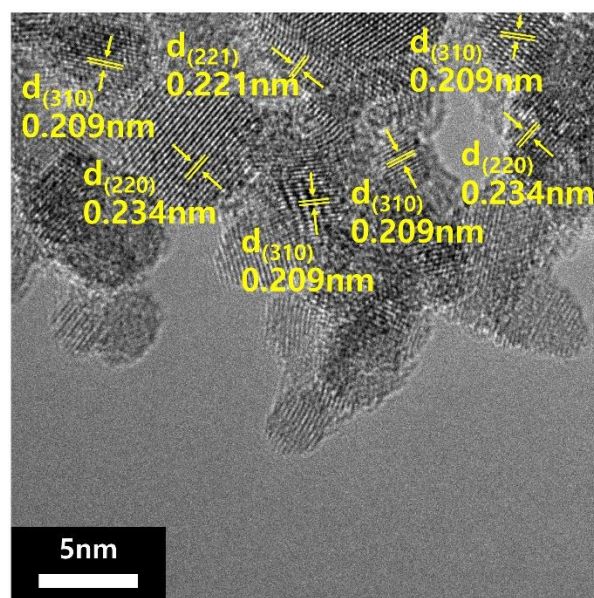

**Fig. S2.** HRTEM image of  $\text{Ni}_2\text{Mo}_3\text{N}/\text{NF}$ .

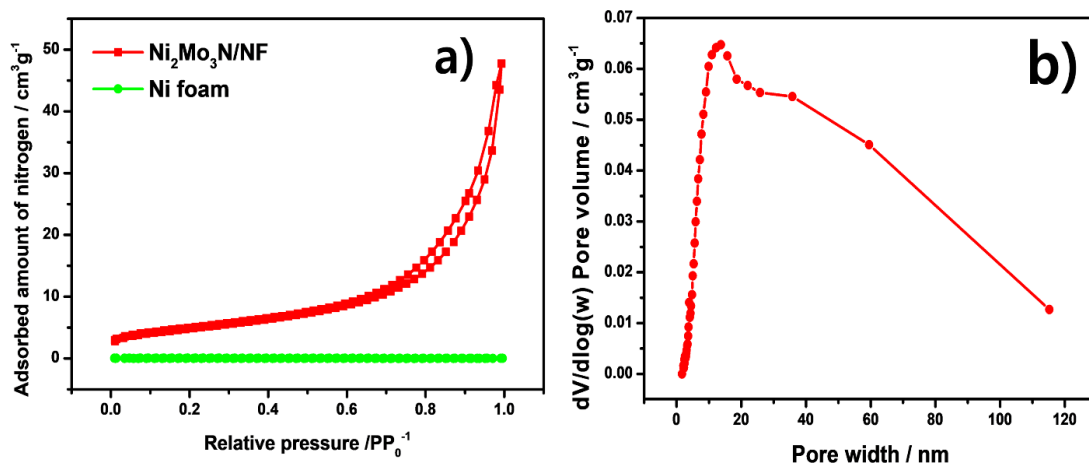

**Fig. S3.** a)  $\text{N}_2$  adsorption-desorption isotherms and b) pore size distribution plot of  $\text{Ni}_2\text{Mo}_3\text{N/NF}$ .

$\text{N}_2$  isotherm of pristine Ni foam was added in a) for comparison.

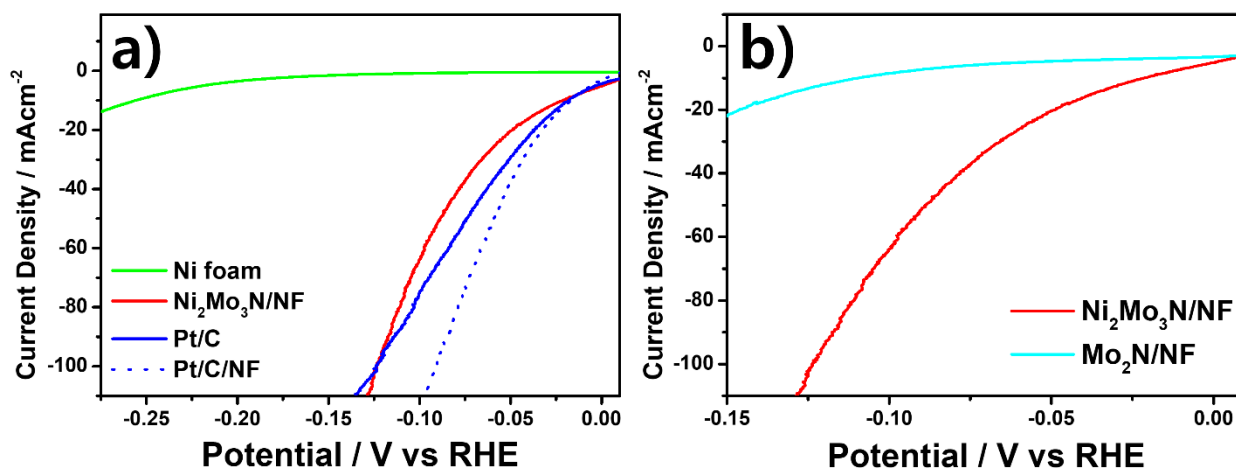

**Fig. S4.** Electrochemical polarization curves for the prepared catalysts a) including Pt/C/NF and b) including  $\text{Mo}_2\text{N/NF}$ .

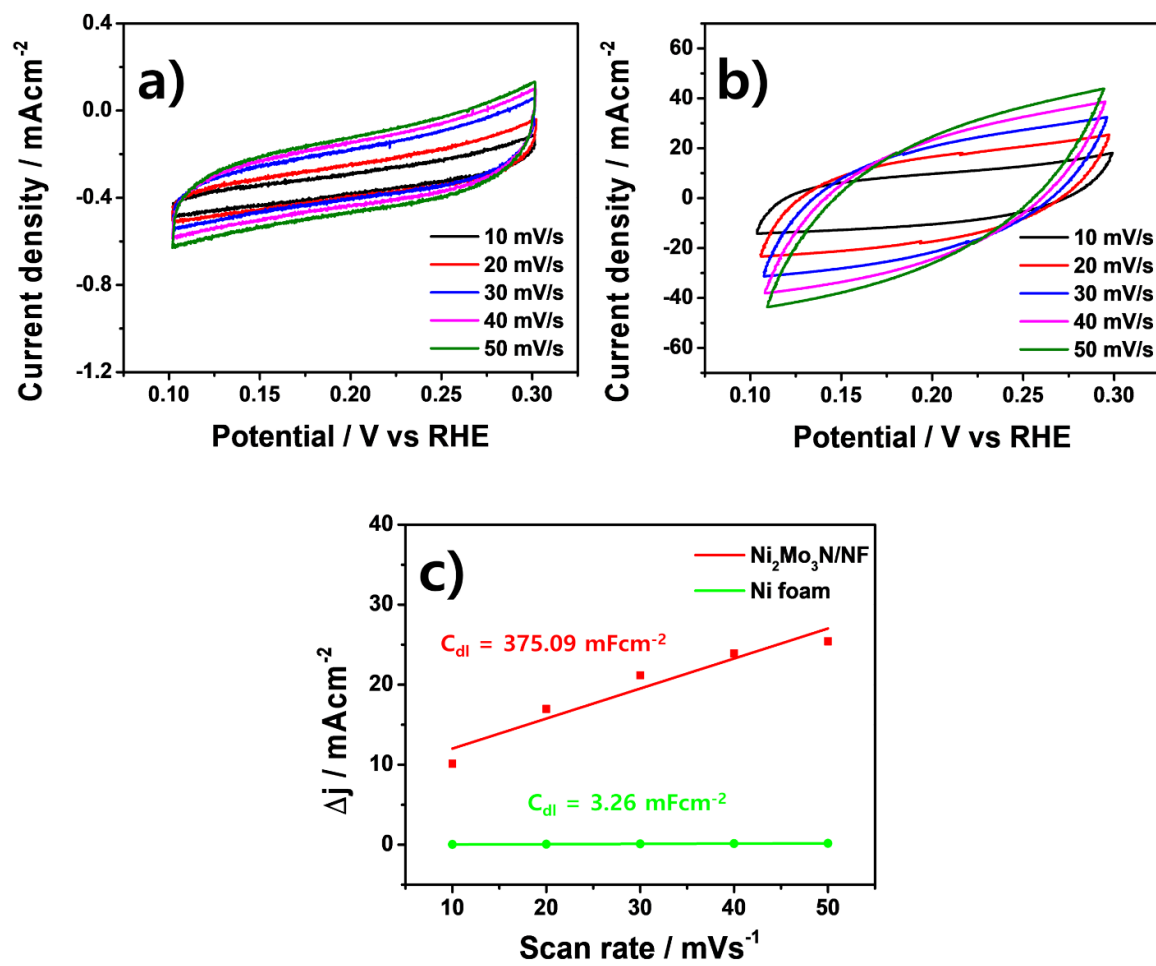

**Fig. S5.** Cyclic voltammograms of a) pristine Ni foam and b) Ni<sub>2</sub>Mo<sub>3</sub>N/NF at different scan rates in 1 M KOH solution. c) The corresponding current density versus scan rate plots showing  $C_{dl}$  values for pristine Ni foam and Ni<sub>2</sub>Mo<sub>3</sub>N/NF.

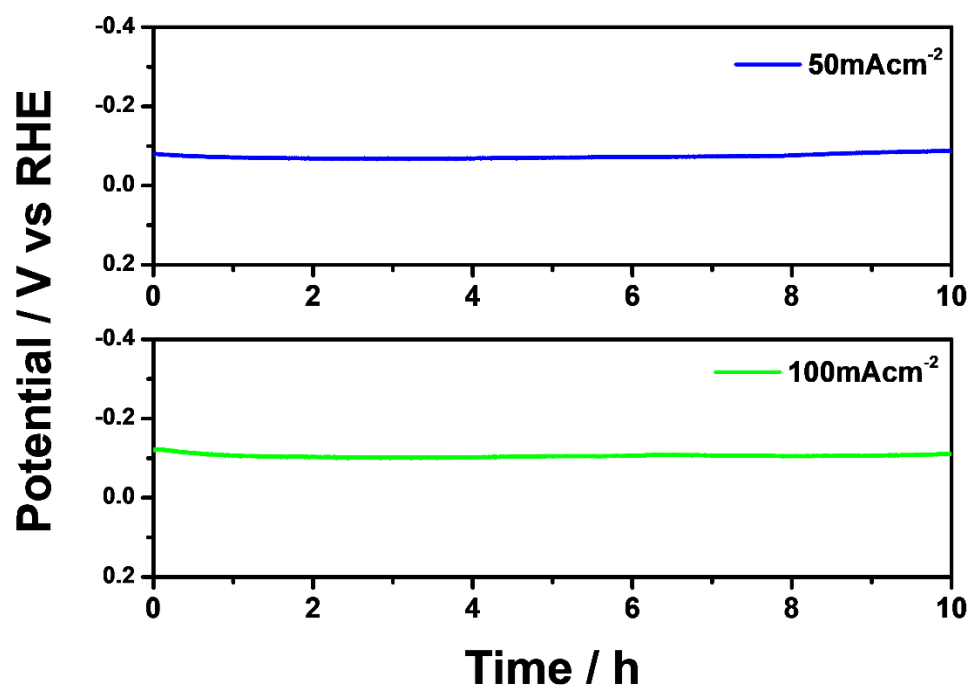

Fig. S6. Chronopotentiometry curves of Ni<sub>2</sub>Mo<sub>3</sub>N/NF at 50 and 100 mA cm<sup>-2</sup> for 10 h.

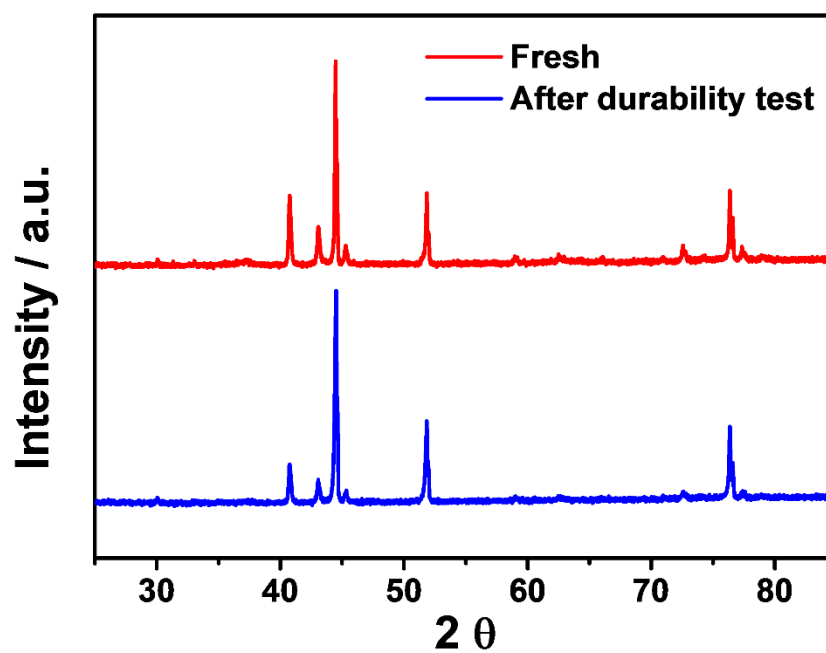

Fig. S7. XRD patterns of Ni<sub>2</sub>Mo<sub>3</sub>N/NF fresh and after durability tests.

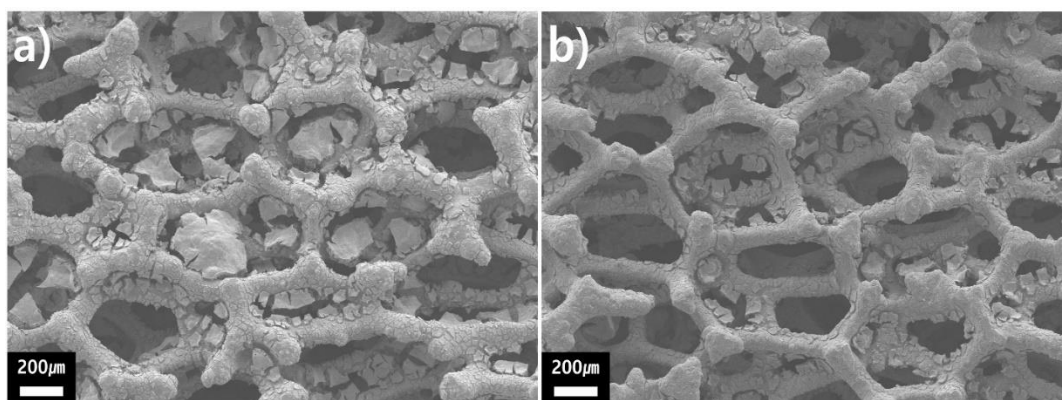

**Fig. S8.** SEM images of  $\text{Ni}_2\text{Mo}_3\text{N}/\text{NF}$  a) before and b) after durability tests.

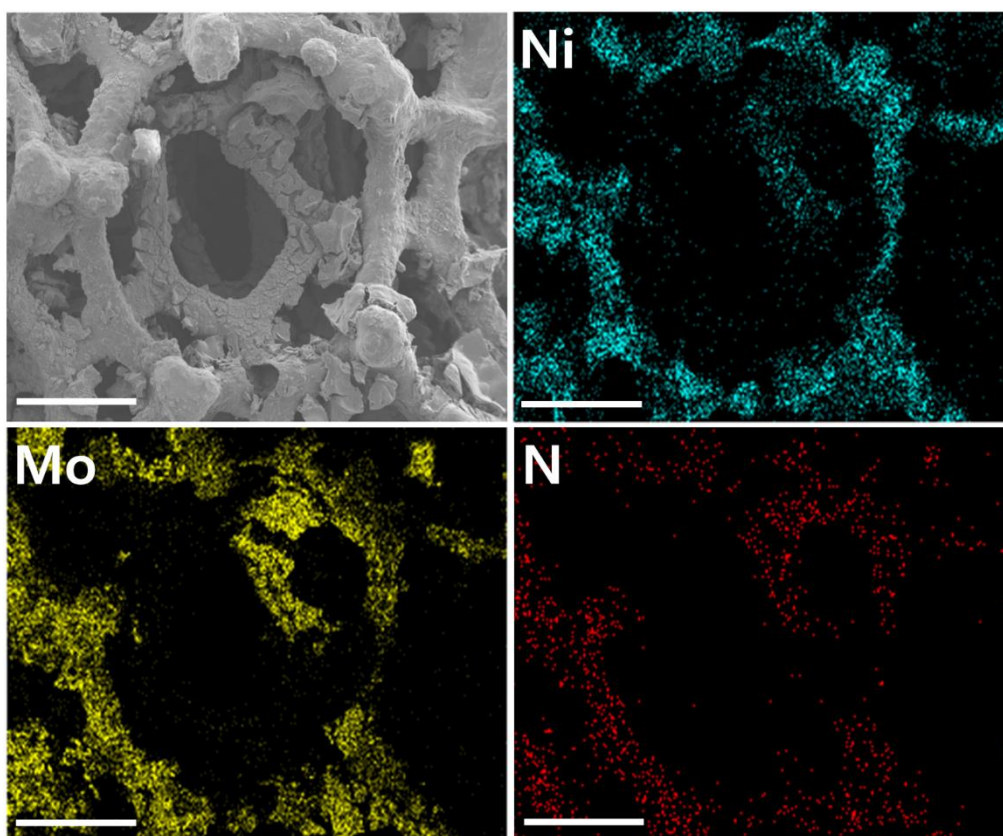

**Fig. S9.** EDS elemental mapping images of  $\text{Ni}_2\text{Mo}_3\text{N}/\text{NF}$  after durability tests (scale bar = 300  $\mu\text{m}$ ).

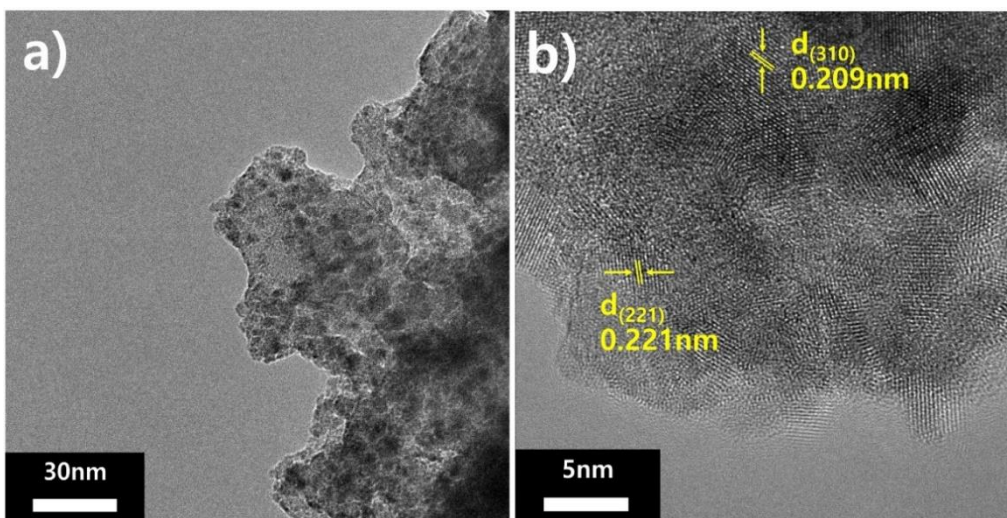

Fig. S10. TEM images of  $\text{Ni}_2\text{Mo}_3\text{N}/\text{NF}$  after durability tests.

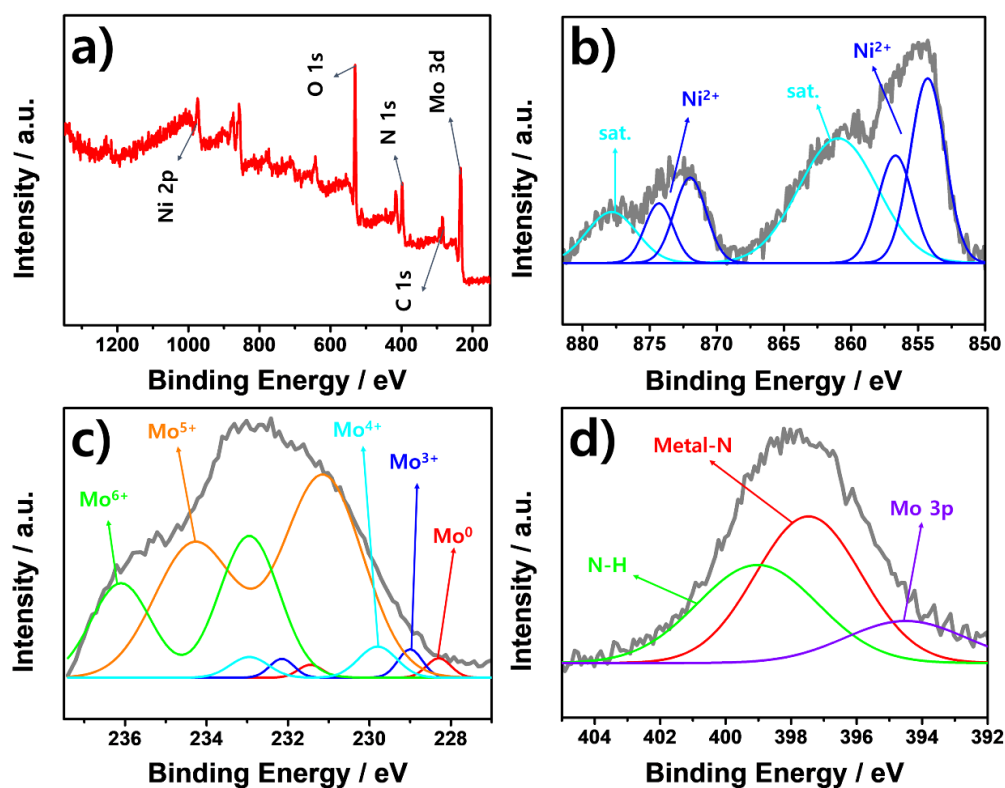

Fig. S11. XPS spectra of  $\text{Ni}_2\text{Mo}_3\text{N}/\text{NF}$  after durability tests for a) survey, b) Ni 2p, c) Mo 3d, and d)

N 1s.

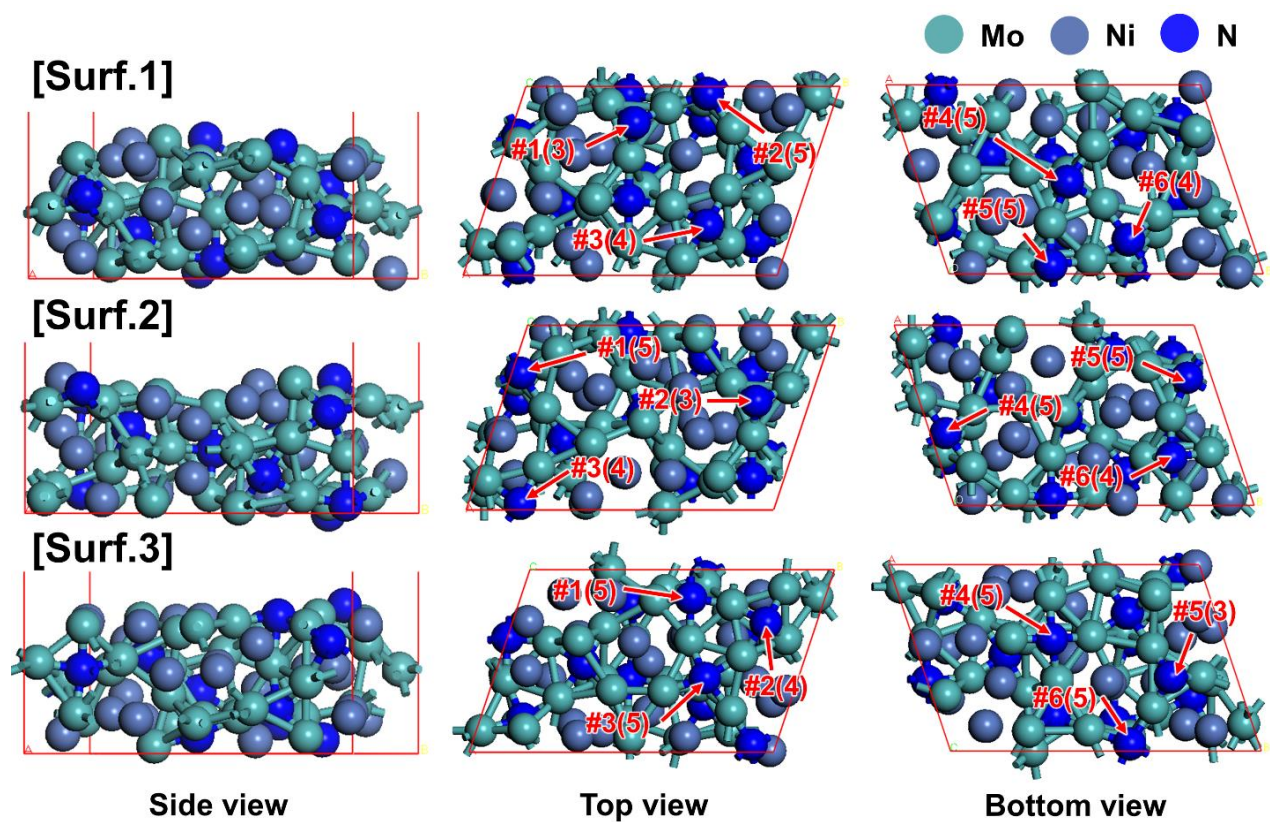

**Fig. S12.** The atomic structure of stoichiometric surface models which parallel to the (221) surface. Possible nitrogen active sites are indicated with a red arrow, and the numbers in parenthesis denote coordination number counting the N-Mo bonding.



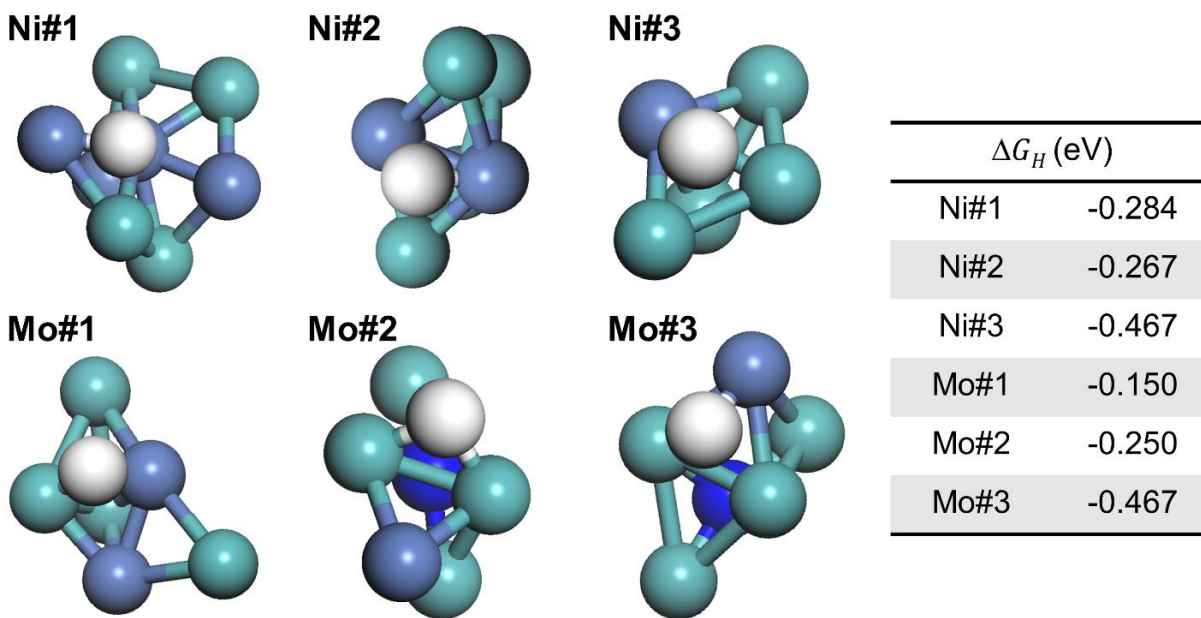

**Fig. S13.** H-adsorption structures and energies for Ni and Mo sites on the surface of Surf.1 in Figure S12. Light blue, turquoise, blue, and white spheres represent Ni, Mo, N, and H atoms, respectively.

**Table S1.** Comparison of the HER performance in alkaline media with reported state-of-the-art TMN-based catalysts.

| Catalyst                                | $\eta_{10}$ (mV)                | $\eta_{100}$ (mV)                 | Tafel slope (mV dec <sup>-1</sup> ) | Reference |
|-----------------------------------------|---------------------------------|-----------------------------------|-------------------------------------|-----------|
| Ni <sub>2</sub> Mo <sub>3</sub> N/NF    | 21.3                            | 123.8                             | 62                                  | This work |
| V-Ni <sub>2</sub> Mo <sub>3</sub> N     | 54                              | 117                               | 42.8                                | 1         |
| V-Ni <sub>0.2</sub> Mo <sub>0.8</sub> N | 39                              | 178<br>(200 mA cm <sup>-2</sup> ) | 37.7                                | 2         |
| NiMoN-NF700                             | 38                              | 118<br>(50 mA cm <sup>-2</sup> )  | 46                                  | 3         |
| FeNi <sub>3</sub> N/NG                  | 98<br>(20 mA cm <sup>-2</sup> ) | 186                               | 83.1                                | 4         |
| Co-NiMoN-400 NRs                        | 45                              |                                   | 72.2                                | 5         |
| Ni@NCNT/NiMoN-8                         | 15                              | 156<br>(50 mA cm <sup>-2</sup> )  | 68                                  | 6         |
| Ni-Mo-N/NG                              | 46.6                            | 159.8                             | 45                                  | 7         |
| Ni-Fe-MoN NTs                           | 55                              | 199                               | 109                                 | 8         |
| NiMoN-550                               | 89                              | ≈260                              | 79                                  | 9         |
| NiMoN                                   | 109                             | ≈180                              | 95                                  | 10        |
| MoVN                                    | 108                             | ≈175                              | 60                                  | 11        |
| NiSP-Co <sub>3</sub> FeN <sub>x</sub>   | 23                              | 147                               | 94                                  | 12        |
| Co <sub>2</sub> Ni <sub>1</sub> N       | 102.6                           | ≈200<br>(50 mA cm <sup>-2</sup> ) | 60.2                                | 13        |
| Mo <sub>2</sub> (CN) <sub>0.5</sub>     | 80                              | 202                               | 40                                  | 14        |
| Co-Mo <sub>2</sub> N@NC                 | 47                              | 170                               | 43                                  | 15        |
| Mo <sub>2</sub> N/NC-2                  | 217                             | ≈410                              | 115.7                               | 16        |
| <i>h</i> -MoN@BNCNT                     | 78                              |                                   | 46                                  | 17        |
| CoN-400/CC                              | 97                              | ≈200                              | 93.9                                | 18        |
| Mo-600                                  | 85                              |                                   | 54                                  | 19        |
| S-2-T5                                  | 76                              | 240                               | 47                                  | 20        |

## References

1. P. Zhou, X. Lv, Y. Gao, Z. Liang, Y. Liu, Z. Wang, P. Wang, Z. Zheng, Y. Dai and B. Huang, *Electrochim. Acta*, 2020, **337**, 135689.
2. P. Zhou, X. Lv, D. Xing, F. Ma, Y. Liu, Z. Wang, P. Wang, Z. Zheng, Y. Dai and B. Huang, *Appl. Catal. B*, 2020, **263**, 118330.
3. B. Chang, J. Yang, Y. Shao, L. Zhang, W. Fan, B. Huang, Y. Wu and X. Hao, *ChemSusChem*, 2018, **11**, 3198-3207.
4. L. Liu, F. Yan, K. Li, C. Zhu, Y. Xie, X. Zhang and Y. Chen, *J. Mater. Chem. A*, 2019, **7**, 1083-1091.
5. Z. Yin, Y. Sun, Y. Jiang, F. Yan, C. Zhu and Y. Chen, *ACS Appl. Mater. Interfaces*, 2019, **11**, 27751-27759.
6. Y. Gong, L. Wang, H. Xiong, M. Shao, L. Xu, A. Xie, S. Zhuang, Y. Tang, X. Yang, Y. Chen and P. Wan, *J. Mater. Chem. A*, 2019, **7**, 13671-13678.
7. S. Xue, W. Zhang, Q. Zhang, J. Du, H.-M. Cheng and W. Ren, *Carbon*, 2020, **165**, 122-128.
8. C. Zhu, Z. Yin, W. Lai, Y. Sun, L. Liu, X. Zhang, Y. Chen and S.-L. Chou, *Adv. Energy Mater.*, 2018, **8**, 1802327.
9. Z. Yin, Y. Sun, C. Zhu, C. Li, X. Zhang and Y. Chen, *J. Mater. Chem. A*, 2017, **5**, 13648-13658.
10. Y. Zhang, B. Ouyang, J. Xu, S. Chen, R. S. Rawat and H. J. Fan, *Adv. Energy Mater.*, 2016, **6**, 1600221.
11. B. Wei, G. Tang, H. Liang, Z. Qi, D. Zhang, W. Hu, H. Shen and Z. Wang, *Electrochem. Commun.*, 2018, **93**, 166-170.

12. Y. Wang, D. Liu, Z. Liu, C. Xie, J. Huo and S. Wang, *Chem. Commun.*, 2016, **52**, 12614-12617.
13. X. Feng, H. Wang, X. Bo and L. Guo, *ACS Appl. Mater. Interfaces*, 2019, **11**, 8018-8024.
14. C. Tang, Q. Hu, F. Li, C. He, X. Chai, C. Zhu, J. Liu, Q. Zhang, B. Zhu and L. Fan, *Electrochim. Acta*, 2018, **280**, 323-331.
15. X. Lang, M. A. Qadeer, G. Shen, R. Zhang, S. Yang, J. An, L. Pan and J.-J. Zou, *J. Mater. Chem. A*, 2019, **7**, 20579-20583.
16. Y.-J. Song and Z.-Y. Yuan, *Electrochim. Acta*, 2017, **246**, 536-543.
17. J. Miao, Z. Lang, X. Zhang, W. Kong, O. Peng, Y. Yang, S. Wang, J. Cheng, T. He, A. Amini, Q. Wu, Z. Zheng, Z. Tang and C. Cheng, *Adv. Funct. Mater.*, 2019, **29**, 1805893.
18. Z. Xue, J. Kang, D. Guo, C. Zhu, C. Li, X. Zhang and Y. Chen, *Electrochim. Acta*, 2018, **273**, 229-238.
19. Z. Lv, M. Tahir, X. Lang, G. Yuan, L. Pan, X. Zhang and J.-J. Zou, *J. Mater. Chem. A*, 2017, **5**, 20932-20937.
20. X. Shi, A. Wu, H. Yan, L. Zhang, C. Tian, L. Wang and H. Fu, *J. Mater. Chem. A*, 2018, **6**, 20100-20109.
